# Supplementary material
Source: ML conference proceedings conference paper supplement (https://proceedings.mlr.press/v119/cai20b.html)
Supplement: Supplementary file 1 [file cai20b-supp.pdf]

---

# Supplementary: On Validation and Planning of An Optimal Decision Rule with Application in Healthcare Studies

---

Hengrui Cai<sup>1</sup> Wenbin Lu<sup>1</sup> Rui Song<sup>1</sup>

## A. Technical Proofs

### A.1. Proof of Lemma 1

(A.) First, we show that  $\hat{\beta}$  converges in probability to  $\beta_0$  as  $n \rightarrow \infty$ , by checking three conditions of the Argmax Theorem:

(a1.) By the regularity condition (C4) that the true value function  $V(\beta)$  has twice continuously differentiable at an inner point of maximum  $\beta_0$ .

(a2.) By the consistency conclusion of Zhang et al. (2012) that  $\hat{V}(\beta) = V(\beta) + o_p(1)$ , i.e., for  $\forall \beta$

$$\hat{V}(\beta) \xrightarrow{p} V(\beta), \quad \text{as } n \rightarrow \infty.$$

(a3.) Since  $\hat{\beta} = \arg \max_{\beta} \hat{V}(\beta)$ , we have the estimated ODR as  $d(X, \hat{\beta}) = I(\phi_X(X)^\top \hat{\beta} > 0)$  and the corresponding value function  $\hat{V}(\hat{\beta})$  such that

$$\hat{V}(\hat{\beta}) \geq \sup_{\beta \in \mathcal{B}} \hat{V}(\beta).$$

Thus, we have  $\hat{\beta} \xrightarrow{p} \beta_0$  as  $n \rightarrow \infty$ .

(B.) Next, we show that the convergence rate of  $\hat{\beta}$  is  $n^{1/3}$ , i.e.  $n^{1/3} \|\hat{\beta} - \beta_0\|_2 = O_p(1)$ , where  $\|\cdot\|_2$  is  $L_2$  norm, via checking three conditions of the Theorem 14.4: Rate of convergence in (Kosorok, 2008). Here, we first proof the result for the inverse probability weighted estimator, which can be trivially extended to the augmented inverse probability weighted estimator.

(b1.) For every  $\beta$  in a neighborhood of  $\beta_0$ , i.e.  $\|\beta - \beta_0\|_2 < \delta$ , by Assumption (10), we take the second order Taylor

---

<sup>1</sup>Department of Statistics, North Carolina State University, Raleigh, USA. Correspondence to: Hengrui Cai <hcai5@ncsu.edu>.

expansion of  $V(\beta)$  at  $\beta = \beta_0$ ,

$$V(\beta) - V(\beta_0) = V'(\beta_0) \|\beta - \beta_0\|_2 + \frac{1}{2} V''(\beta_0) \|\beta - \beta_0\|_2^2 + o\{\|\beta - \beta_0\|_2^2\}$$

$$\text{(by } V'(\beta_0) = 0) = \frac{1}{2} V''(\beta_0) \|\beta - \beta_0\|_2^2 + o\{\|\beta - \beta_0\|_2^2\}.$$

Since  $V''(\beta_0) < 0$ , there exist  $c_1 = -\frac{1}{2} V''(\beta_0) > 0$  such that  $V(\beta) - V(\beta_0) \leq c_1 \|\beta - \beta_0\|_2^2$  holds.

(b2.) First, define

$$f_i(\beta) = \frac{I\{A_i = d(X_i, \beta)\}}{\pi A_i + (1 - \pi)(1 - A_i)} Y_i.$$

With the fact that

$$\begin{aligned} & I\{A_i = d(X_i, \beta)\} - I\{A_i = d(X_i, \beta_0)\} \\ &= A_i I(\phi_X(X_i)^\top \beta > 0) + (1 - A_i) \{1 - I(\phi_X(X_i)^\top \beta > 0)\} \\ &\quad - [A_i I(\phi_X(X_i)^\top \beta_0 > 0) + (1 - A_i) \{1 - I(\phi_X(X_i)^\top \beta_0 > 0)\}] \\ &= (2A_i - 1) \{I(\phi_X(X_i)^\top \beta > 0) - I(\phi_X(X_i)^\top \beta_0 > 0)\}, \end{aligned} \tag{1}$$

we have,

$$\begin{aligned} \hat{V}(\beta) - \hat{V}(\beta_0) &= \frac{1}{n} \sum_{i=1}^n \{f_i(\beta) - f_i(\beta_0)\} \\ &= \frac{1}{n} \sum_{i=1}^n \frac{Y_i \{I(A_i = d(X_i; \beta)) - I(A_i = d(X_i; \beta_0))\}}{\pi A_i + (1 - \pi)(1 - A_i)} \\ &= \frac{1}{n} \sum_{i=1}^n \frac{Y_i (2A_i - 1) \{I(\phi_X(X_i)^\top \beta > 0) - I(\phi_X(X_i)^\top \beta_0 > 0)\}}{\pi A_i + (1 - \pi)(1 - A_i)}. \end{aligned} \tag{2}$$

Then, we define a class of function

$$\mathcal{F}_{\beta}^1(x, a, y) = \left\{ \frac{y(2a-1)}{a\pi+(1-a)\{1-\pi\}} \{ (I(\phi_X(x)^\top \beta > 0) - I(\phi_X(x)^\top \beta_0 > 0)) : \|\beta - \beta_0\|_2 < \delta \} \right\}.$$

Let  $M_1 = \sup \left| \frac{y(2a-1)}{a\pi+(1-a)\{1-\pi\}} \right|$ , by the regularity condition (C1) that  $Y$  is bounded, we have  $M_1 < \infty$ . Then, we define

the envelope of  $\mathcal{F}_\beta^1$  as  $F_1 = M_1 \cdot I(1 - \delta \leq \phi_X(x)^\top \beta_0 \leq 1 + \delta)$ ; by Assumption (6) that the density function of covariate  $f_X(x)$  is bounded away from 0 and  $\infty$ , thus,

$$\begin{aligned} \|F_1\|_{P,2} &= M_1 \sqrt{P(1 - \delta \leq \phi_X(x)^\top \beta_0 \leq 1 + \delta)} \\ &= M_1 \sqrt{f_X(\beta_0) \cdot 2\delta} = M_1 \sqrt{2f_X(\beta_0)} \delta^{\frac{1}{2}} < \infty. \end{aligned}$$

Since  $\mathcal{F}_\beta^1$  is an indicate function, by the conclusion of the Lemma 2.6.15 and Lemma 2.6.18 (iii) in (Wellner et al., 2013),  $\mathcal{F}_\beta^1$  is a VC (and hence Donsker) class of functions. Thus, the entropy of the class function  $\mathcal{F}_\beta^1$  denoted as  $J_{[]}^*(1, \mathcal{F}^1)$  is finite, i.e.,  $J_{[]}^*(1, \mathcal{F}^1) < \infty$ .

Next, we consider the following empirical process indexed by  $\beta$ ,

$$\mathbb{G}_n \mathcal{F}_\beta^1 = \frac{1}{\sqrt{n}} \sum_{i=1}^n \{\mathcal{F}_\beta^1(X_i, A_i, Y_i) - E\mathcal{F}_\beta^1(X_i, A_i, Y_i)\}.$$

Note that  $\mathbb{G}_n \mathcal{F}_\beta^1 = \sqrt{n}[\widehat{V}(\beta) - \widehat{V}(\beta_0) - \{V(\beta) - V(\beta_0)\}]$  by Equation (2). Therefore, by applying Theorem 11.2 in (Kosorok, 2008), we have,

$$\begin{aligned} E^* \sup_{\|\beta - \beta_0\|_2 < \delta} \sqrt{n} |\widehat{V}(\beta) - V(\beta) - \{\widehat{V}(\beta_0) - V(\beta_0)\}| \\ = E^* \sup_{\|\beta - \beta_0\|_2 < \delta} |\mathbb{G}_n \mathcal{F}_\beta^1| \leq c_1 J_{[]}^*(1, \mathcal{F}^1) \|F_1\|_{P,2} \\ = c_1 J_{[]}^*(1, \mathcal{F}^1) M_1 \sqrt{2f_X(\beta_0)} \delta^{\frac{1}{2}}, \end{aligned}$$

where  $E^*$  is the outer expectation, and  $c_1$  is a finite constant.

Let  $C_1^* \equiv c_1 J_{[]}^*(1, \mathcal{F}^1) M_1 \sqrt{2f_X(\beta_0)}$ , since  $J_{[]}^*(1, \mathcal{F}^1)$ ,  $M_1$ , and  $f_X(\cdot)$  are bounded, we have  $C_1^* < \infty$ .

Thus, for all  $n$  large enough and sufficiently small  $\delta$ , the centered process  $\widehat{V} - V$  satisfies

$$\begin{aligned} E^* \sup_{\|\beta - \beta_0\|_2 < \delta} \sqrt{n} |\widehat{V}(\beta) - V(\beta) - \{\widehat{V}(\beta_0) - V(\beta_0)\}| \\ \leq C_1^* \delta^{\frac{1}{2}}. \end{aligned}$$

Let  $\phi_n(\delta) = C_1^* \delta^{\frac{1}{2}}$ , and  $\alpha = \frac{3}{2} < 2$ , check  $\frac{\phi_n(\delta)}{\delta^\alpha} = \frac{\delta^{\frac{1}{2}}}{\delta^{\frac{3}{2}}} = \delta^{-1}$  is decreasing not depending on  $n$ . Therefore, condition B holds.

(b3.) By  $\widehat{\beta} \xrightarrow{p} \beta_0$  as  $n \rightarrow \infty$  and  $\widehat{V}(\widehat{\beta}) \geq \sup_{\beta \in B} \widehat{V}(\beta)$  shown previously, choose  $r_n = n^{1/3}$ , then  $r_n$  satisfies

$$\begin{aligned} r_n^2 \phi_n(r_n^{-1}) &= n^{2/3} \phi_n(n^{-1/3}) \\ &= n^{2/3} (n^{-1/3})^{1/2} = n^{2/3-1/6} = n^{1/2}. \end{aligned}$$

Thus, condition C holds.

By the Theorem 14.4 in (Kosorok, 2008), we have  $n^{1/3} \|\widehat{\beta} - \beta_0\|_2 = O_p(1)$ .

□

## A.2. Proof of Proposition 1

To show

$$\sqrt{n} \{\widehat{V}(\widehat{\beta}) - \widehat{V}(\beta_0)\} = o_p(1),$$

is sufficient to show  $\sqrt{n}\{V(\widehat{\beta}) - V(\beta_0)\} = o_p(1)$  and  $\sqrt{n}[\{\widehat{V}(\widehat{\beta}) - \widehat{V}(\beta_0)\} - \{V(\widehat{\beta}) - V(\beta_0)\}] = o_p(1)$ .

(a1.) First, by  $n^{1/3} \|\widehat{\beta} - \beta_0\|_2 = O_p(1)$  and the regularity condition (C4), we take the second order Taylor expansion of  $V(\widehat{\beta})$  at  $\beta_0$ , then

$$\begin{aligned} &\sqrt{n}\{V(\widehat{\beta}) - V(\beta_0)\} \\ &= \sqrt{n}[V'(\beta_0) \|\widehat{\beta} - \beta_0\|_2 + \frac{1}{2} V''(\beta_0) \|\widehat{\beta} - \beta_0\|_2^2 \\ &\quad + o_p\{\|\widehat{\beta} - \beta_0\|_2^2\}] \\ &\quad (\text{by } V'(\beta_0) = 0) = \sqrt{n}\{\frac{1}{2} V''(\beta_0) O_E(n^{-\frac{2}{3}}) + o_p(n^{-\frac{2}{3}})\} \\ &= \frac{1}{2} V''(\beta_0) O_E(n^{-\frac{1}{6}}) = o_p(1). \end{aligned} \tag{3}$$

(a2.) Next, recall the result in the proof of Lemma 1 that

$$E^* \sup_{\|\beta - \beta_0\|_2 < \delta} \sqrt{n} |\widehat{V}(\beta) - V(\beta) - \{\widehat{V}(\beta_0) - V(\beta_0)\}| \leq C_1^* \delta^{\frac{1}{2}},$$

where  $C_1^*$  is a finite constant. Since  $\|\widehat{\beta} - \beta_0\|_2 = O_p(n^{-1/3})$ , i.e.,  $\|\widehat{\beta} - \beta_0\|_2 = c_4 n^{-1/3}$ , where  $c_4$  is a finite constant, we have,

$$\begin{aligned} &\sqrt{n} [\{\widehat{V}(\widehat{\beta}) - \widehat{V}(\beta_0)\} - \{V(\widehat{\beta}) - V(\beta_0)\}] \\ &\leq E^* \sup_{\|\beta - \beta_0\|_2 < c_4 n^{-1/3}} \sqrt{n} |\widehat{V}(\beta) - V(\beta) - \{\widehat{V}(\beta_0) - V(\beta_0)\}| \\ &\leq C_1^* \sqrt{c_4 n^{-1/3}} = C_1^* \sqrt{c_4} n^{-1/6} = o_p(1). \end{aligned} \tag{4}$$

(a3.) Thus, from the results of (3) and (4), we have,

$$\begin{aligned} &\sqrt{n} \{\widehat{V}(\widehat{\beta}) - \widehat{V}(\beta_0)\} \\ &= \sqrt{n} [\{\widehat{V}(\widehat{\beta}) - \widehat{V}(\beta_0)\} - \{V(\widehat{\beta}) - V(\beta_0)\}] \\ &\quad + \sqrt{n} \{V(\widehat{\beta}) - V(\beta_0)\} \\ &= o_p(1) + o_p(1) = o_p(1). \end{aligned}$$

□

### A.3. Proof of Theorem 1: Asymptotic distribution of the test statistic under $H_0$

Under  $H_0$ , we have  $d(X, \beta_0) \equiv 1$  and  $V(\beta_0) = V_1$ . Based on Lemma 1 and Proposition 1, we have

$$\begin{aligned}
 \widehat{\Delta}_n &= \sqrt{n}\{\widehat{V}(\widehat{\beta}) - \widehat{V}_1\} \\
 &= \frac{1}{\sqrt{n}} \sum_{i=1}^n \left[ \frac{I\{A_i = d(X_i, \widehat{\beta})\}}{\pi A_i + (1-\pi)(1-A_i)} \{Y_i - \widehat{\mu}(X_i, \widehat{\beta})\} \right. \\
 &\quad \left. + \widehat{\mu}(X_i, \widehat{\beta}) - \frac{A_i Y_i}{\pi} \right] \\
 &= \frac{1}{\sqrt{n}} \sum_{i=1}^n \left[ \frac{I\{A_i = d(X_i, \beta_0)\}}{\pi A_i + (1-\pi)(1-A_i)} \{Y_i - \mu(X_i, \beta_0)\} \right. \\
 &\quad \left. + \mu(X_i, \beta_0) - \frac{A_i Y_i}{\pi} \right] + o_p(1) \\
 &= \frac{1}{\sqrt{n}} \sum_{i=1}^n \left[ \frac{I\{A_i = 1\}}{\pi A_i + (1-\pi)(1-A_i)} \{Y_i - \mu_1(X_i)\} \right. \\
 &\quad \left. + \mu_1(X_i) - \frac{A_i Y_i}{\pi} \right] + o_p(1) \\
 &= \frac{1}{\sqrt{n}} \sum_{i=1}^n \left[ \frac{A_i}{\pi} \{Y_i - \mu_1(X_i)\} + \mu_1(X_i) - \frac{A_i Y_i}{\pi} \right] + o_p(1) \\
 &= \frac{1}{\sqrt{n}} \sum_{i=1}^n \left\{ \frac{A_i}{\pi} - 1 \right\} \mu_1(X_i) + o_p(1).
 \end{aligned}$$

By Central Limit Theorem, we have  $\widehat{\Delta}_n$  converges in distribution to a normal random variable with mean 0 and variance  $\sigma_0^2 = \frac{1-\pi}{\pi} \text{Var}\{E(Y|A=1, X)\}$ .

□

### A.4. Proof of Theorem 2: Asymptotic distribution of the test statistic under $H_{a,n}$

Under  $H_{a,n}$ , we have  $\sqrt{n}\{V(\beta_0) - V_1\} = \Delta$ . Based on Lemma 1 and Proposition 1, we have

$$\begin{aligned}
 \widehat{\Delta}_n &= \frac{1}{\sqrt{n}} \sum_{i=1}^n \left[ \frac{I\{A_i = d(X_i, \beta_0)\}}{\pi A_i + (1-\pi)(1-A_i)} \{Y_i - \mu(X_i, \beta_0)\} \right. \\
 &\quad \left. + \mu(X_i, \beta_0) - \frac{A_i Y_i}{\pi} \right] + o_p(1) \\
 &= \frac{1}{\sqrt{n}} \sum_{i=1}^n \left[ \frac{I\{A_i = d(X_i, \beta_0)\}}{\pi A_i + (1-\pi)(1-A_i)} \{Y_i - \mu(X_i, \beta_0)\} \right. \\
 &\quad \left. + \mu(X_i, \beta_0) - V(\beta_0) - \frac{A_i Y_i}{\pi} + V_1 \right] \\
 &\quad + \sqrt{n}\{V(\beta_0) - V_1\} + o_p(1)
 \end{aligned}$$

$$\begin{aligned}
 &= \frac{1}{\sqrt{n}} \sum_{i=1}^n \left[ \frac{I\{A_i = d(X_i, \beta_0)\}}{\pi A_i + (1-\pi)(1-A_i)} \{Y_i - \mu(X_i, \beta_0)\} \right. \\
 &\quad \left. + \mu(X_i, \beta_0) - V(\beta_0) - \left( \frac{A_i}{\pi} Y_i - V_1 \right) \right] \\
 &\quad + \Delta + o_p(1) \\
 &= \Delta + \frac{1}{\sqrt{n}} \sum_{i=1}^n \phi_i + o_p(1),
 \end{aligned}$$

where

$$\begin{aligned}
 \phi_i &= \frac{I\{A_i = d(X_i, \beta_0)\}}{\pi A_i + (1-\pi)(1-A_i)} \{Y_i - \mu(X_i, \beta_0)\} \\
 &\quad + \mu(X_i, \beta_0) - V(\beta_0) - \left( \frac{A_i}{\pi} Y_i - V_1 \right).
 \end{aligned}$$

Therefore,  $\widehat{\Delta}$  converges in distribution to a random variable with mean  $\Delta$  and variance  $\sigma_\phi^2 = E(\phi_i^2)$ .

□

### A.5. The degenerate distribution of $\sqrt{n}\{\widehat{V}(\widehat{\beta}) - \widehat{V}^1\}$ under $H_0$

Following the proof of Theorem 1, by replacing  $\widehat{V}_1$  with  $\widehat{V}^1$ , we have

$$\begin{aligned}
 \widehat{\Delta}_n &= \sqrt{n}\{\widehat{V}(\widehat{\beta}) - \widehat{V}^1\} \\
 &= \frac{1}{\sqrt{n}} \sum_{i=1}^n \left[ \frac{I\{A_i = d(X_i, \widehat{\beta})\}}{\pi A_i + (1-\pi)(1-A_i)} \{Y_i - \widehat{\mu}(X_i, \widehat{\beta})\} \right. \\
 &\quad \left. + \widehat{\mu}(X_i, \widehat{\beta}) - \frac{A_i}{\pi} \{Y_i - \widehat{\mu}_1(X_i)\} - \widehat{\mu}_1(X_i) \right] \\
 &\quad \text{(By Lemma 1 and Proposition 1)} \\
 &= \frac{1}{\sqrt{n}} \sum_{i=1}^n \left[ \frac{I\{A_i = d(X_i, \beta_0)\}}{\pi A_i + (1-\pi)(1-A_i)} \{Y_i - \mu(X_i, \beta_0)\} \right. \\
 &\quad \left. + \mu(X_i, \beta_0) - \frac{A_i}{\pi} \{Y_i - \mu_1(X_i)\} - \mu_1(X_i) \right] + o_p(1) \\
 &\quad \text{(Under } H_0, \text{ we have } d(X, \beta_0) \equiv 1) \\
 &= \frac{1}{\sqrt{n}} \sum_{i=1}^n \left[ \frac{I\{A_i = 1\}}{\pi A_i + (1-\pi)(1-A_i)} \{Y_i - \mu_1(X_i)\} \right. \\
 &\quad \left. + \mu_1(X_i) - \frac{A_i}{\pi} \{Y_i - \mu_1(X_i)\} - \mu_1(X_i) \right] + o_p(1) \\
 &\quad \text{(With all the terms cancel out, we have)} = o_p(1).
 \end{aligned}$$

Therefore, under the null and the regular assumption,  $\sqrt{n}\{\widehat{V}(\widehat{\beta}) - \widehat{V}^1\}$  asymptotically converges in distribution to 0. One may also conclude that the IPW estimators for  $\widehat{\beta}$  and the naive rule are asymptotically identical under the null by a similar proof.

Table S1. Simulation results of the proposed test under the Nelder-Mead Method.

| SCEN.           | RESULTS         | $h = 0.5$    |              | $h = 1$      |              |
|-----------------|-----------------|--------------|--------------|--------------|--------------|
|                 |                 | $\gamma = 1$ | $\gamma = 2$ | $\gamma = 1$ | $\gamma = 2$ |
| 1               | $V_1$           | 3.00         | 5.00         | 4.00         | 6.00         |
|                 | $V(\beta_0)$    | 3.00         | 5.00         | 4.00         | 6.00         |
|                 | ERR.            | 5.4%         | 5.4%         | 5.4%         | 5.4%         |
| 2               | $V_1$           | 2.00         | 3.00         | 3.00         | 4.00         |
|                 | $V(\beta_0)$    | 2.04         | 3.08         | 3.04         | 4.08         |
|                 | Pow.            | 19.2%        | 25.8%        | 14.4%        | 19.2%        |
|                 | $\hat{\beta}_1$ | 0.667        | 0.615        | 0.663        | 0.610        |
|                 | $\hat{\beta}_2$ | 0.042        | 0.018        | 0.038        | 0.015        |
|                 | $\hat{\beta}_3$ | 0.026        | 0.027        | 0.037        | 0.022        |
|                 | $\hat{\beta}_4$ | 0.543        | 0.570        | 0.545        | 0.577        |
|                 | $\hat{\beta}_5$ | -0.507       | -0.544       | -0.511       | -0.543       |
|                 | 3               | $V_1$        | 1.50         | 2.00         | 2.50         |
| $V(\beta_0)$    |                 | 1.64         | 2.28         | 2.64         | 3.28         |
| Pow.            |                 | 92.4%        | 99.4%        | 59.8%        | 89.6%        |
| $\hat{\beta}_1$ |                 | 0.340        | 0.332        | 0.344        | 0.336        |
| $\hat{\beta}_2$ |                 | 0.002        | -0.001       | 0.007        | 0.001        |
| $\hat{\beta}_3$ |                 | 0.010        | 0.003        | 0.006        | -0.004       |
| $\hat{\beta}_4$ |                 | 0.628        | 0.652        | 0.630        | 0.647        |
| $\hat{\beta}_5$ |                 | -0.700       | -0.681       | -0.696       | -0.685       |

Table S2. Simulation results of the proposed test under the Simulated Annealing.

| SCEN.           | RESULTS         | $h = 0.5$    |              | $h = 1$      |              |
|-----------------|-----------------|--------------|--------------|--------------|--------------|
|                 |                 | $\gamma = 1$ | $\gamma = 2$ | $\gamma = 1$ | $\gamma = 2$ |
| 1               | $V_1$           | 3.00         | 5.00         | 4.00         | 6.00         |
|                 | $V(\beta_0)$    | 3.00         | 5.00         | 4.00         | 6.00         |
|                 | ERR.            | 5.4%         | 5.8%         | 5.2%         | 5.4%         |
| 2               | $V_1$           | 2.00         | 3.00         | 3.00         | 4.00         |
|                 | $V(\beta_0)$    | 2.04         | 3.08         | 3.04         | 4.08         |
|                 | Pow.            | 19.0%        | 23.6%        | 12.2%        | 17.2%        |
|                 | $\hat{\beta}_1$ | 0.599        | 0.593        | 0.597        | 0.590        |
|                 | $\hat{\beta}_2$ | -0.011       | -0.005       | -0.003       | -0.002       |
|                 | $\hat{\beta}_3$ | -0.010       | 0.001        | 0.007        | 0.010        |
|                 | $\hat{\beta}_4$ | 0.566        | 0.570        | 0.566        | 0.572        |
|                 | $\hat{\beta}_5$ | -0.566       | -0.569       | -0.568       | -0.570       |
|                 | 3               | $V_1$        | 1.50         | 2.00         | 2.50         |
| $V(\beta_0)$    |                 | 1.64         | 2.28         | 2.64         | 3.28         |
| Pow.            |                 | 85.8%        | 97.8%        | 51.4%        | 85.8%        |
| $\hat{\beta}_1$ |                 | 0.359        | 0.351        | 0.356        | 0.350        |
| $\hat{\beta}_2$ |                 | -0.007       | 0.006        | -0.009       | 0.006        |
| $\hat{\beta}_3$ |                 | -0.004       | 0.003        | 0.009        | 0.001        |
| $\hat{\beta}_4$ |                 | 0.656        | 0.659        | 0.663        | 0.661        |
| $\hat{\beta}_5$ |                 | -0.664       | -0.665       | -0.659       | -0.664       |

## B. Additional Results

### B.1. Testing and evaluation with linear decision rule under the Nelder-Mead Method.

### B.2. Testing and evaluation with linear decision rule under the Simulated Annealing.

## References

Kosorok, M. R. *Introduction to empirical processes and semiparametric inference*. Springer, 2008.

Wellner, J. et al. *Weak convergence and empirical processes: with applications to statistics*. Springer Science & Business Media, 2013.

Zhang, B., Tsiatis, A. A., Laber, E. B., and Davidian, M. A robust method for estimating optimal treatment regimes. *Biometrics*, 68:1010–1018, 2012.
